1 **Persistence of endogenous SARS-CoV-2 and pepper mild mottle virus RNA in wastewater**  
2 **settled solids**

3  
4 Laura Roldan-Hernandez<sup>1</sup>, Katherine E. Graham<sup>1</sup>, Dorothea Duong<sup>2</sup>, Alexandria B. Boehm<sup>1\*</sup>

5  
6 <sup>1</sup> Department of Civil and Environmental Engineering, Stanford University, 473 Via Ortega,  
7 Stanford 94305, California, United States

8 <sup>2</sup> Verily Life Sciences, South San Francisco, 94080, California, United States

9  
10 \*Corresponding Author:

11 Alexandria B. Boehm

12 Department of Civil and Environmental Engineering, Stanford University, 473 Via Ortega,  
13 Stanford 94305, California, United States

14 Email address: [aboehm@stanford.edu](mailto:aboehm@stanford.edu)

15

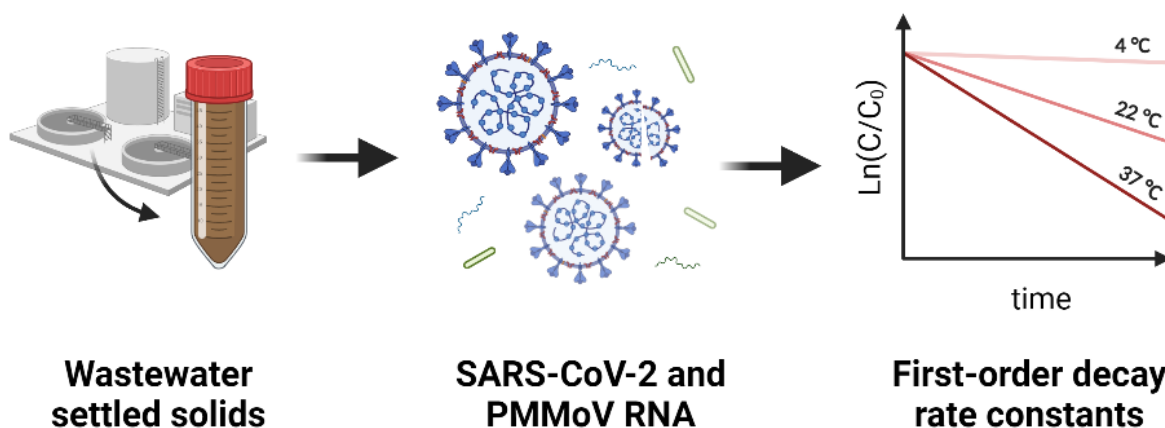

16

17

18 **Abstract**

19 Limited information is available on the decay rate of endogenous SARS-CoV-2 and pepper mild

20 mottle virus (PMMoV) RNA in wastewater and primary settled solids, potentially limiting an

21 understanding of how transit or holding times within wastewater infrastructure might impact

22 RNA measurements and their relationship to community COVID-19 infections. In this study,

23 primary settled solids samples were collected from two wastewater treatment plants in the San

24 Francisco Bay Area. Samples were thoroughly mixed, aliquoted into subsamples, and stored at  
25 4°C, 22°C, and 37 °C for 10 days. The concentration of SARS-CoV-2 (N1 and N2 targets) and  
26 PMMoV RNA was measured using an RT-ddPCR. Limited decay ( $< 1 \log_{10}$  reduction) was  
27 observed in the detection of viral RNA targets at all temperature conditions, suggesting that  
28 SARS-CoV-2 and PMMoV RNA can be highly persistent in solids. First-order decay rate  
29 constants ranged from 0.011 - 0.098 day<sup>-1</sup> for SARS-CoV-2 RNA and 0.010 - 0.091 day<sup>-1</sup> for  
30 PMMoV RNA, depending on temperature conditions. Slower decay was observed for SARS-  
31 CoV-2 RNA in primary settled solids compared to previously reported decay in wastewater  
32 influent. Further research is needed to understand if solid content and wastewater characteristics  
33 might influence the persistence of viral RNA targets.

34 **Keywords:** SARS-CoV-2, PMMoV, decay, settled solids, wastewater

35 **Synopsis:** SARS-CoV-2 and PMMoV genomic RNA is highly stable in wastewater settled solids  
36 over 10 days at several environmentally relevant temperatures.

### 37 **Introduction**

38 Previous studies showed that RNA from SARS-CoV-2 is naturally concentrated in primary settled  
39 solids at wastewater treatment plants.<sup>1,2</sup> Further, researchers have found a significant correlation  
40 between SARS-CoV-2 RNA isolated from primary settled solids samples and laboratory-  
41 confirmed COVID-19 cases<sup>3-7</sup> thus, settled solids might be an advantageous medium for  
42 wastewater-based epidemiology efforts. Laboratory-confirmed COVID-19 incidence may be  
43 considerably smaller than actual COVID-19 incidence owing to test-seeking behaviors which are  
44 influenced by testing availability and symptom presence and severity.<sup>8,9</sup> Some studies aim to infer  
45 actual COVID-19 incident cases from wastewater concentrations of SARS-CoV-2 RNA using  
46 models.<sup>10-12</sup> Such models require the input of various parameters including fecal loads, viral  
47 shedding rates, flow to the wastewater treatment plant, decay rate constant and partition

48 coefficient of SARS-CoV-2 RNA, and the average residence time of wastewater prior to sample  
49 collection. In some models, PMMoV RNA is used as an endogenous viral process control and as  
50 a fecal strength control.<sup>5</sup> The accuracy of these models is still uncertain and further research is  
51 still needed to improve them. Understanding the decay rate of SARS-CoV-2 and PMMoV RNA is  
52 critical in their implementation.

53  
54 Only a few studies<sup>13-17</sup> have documented the persistence of SARS-CoV-2 RNA and infectious  
55 SARS-CoV-2 viruses in wastewater (Table 1), all those studies have been conducted using  
56 wastewater influent as the experimental matrix. Additionally, most of these studies do not  
57 measure the decay of endogenous SARS-CoV-2 RNA, rather they seed the wastewater with an  
58 exogenous virus. A recent study by Chik et al.<sup>18</sup> found that surrogate spikes of SARS-CoV-2 (in  
59 this case gamma-irradiated inactivated SARS-CoV-2) may exhibit different solid-liquid  
60 partitioning behaviors compared to SARS-CoV-2 naturally found in wastewater. Virus  
61 persistence can be influenced by the degree of sorption to solids.<sup>19</sup> To date, no study has  
62 documented the decay of SARS-CoV-2 RNA in wastewater primary settled solids, based on a  
63 systematic search of the literature on 11 November 2021 (Table S1).

64  
65 Normalizing SARS-CoV-2 RNA concentrations by concentrations of PMMoV is a widespread  
66 practice for relating SARS-CoV-2 RNA target concentrations to laboratory-confirmed COVID-19  
67 incidence. Normalizing by PMMoV theoretically controls for fluctuations in population  
68 contributing to a given wastewater sample; however, it may also correct for variation in RNA  
69 recoveries between samples<sup>5</sup>, and for losses of RNA during storage.<sup>20</sup> PMMoV is a non-  
70 enveloped single-strand RNA virus highly abundant in human feces and wastewater.<sup>21,22</sup> Studies  
71 have shown that PMMoV RNA is remarkably stable in wastewater and exhibits almost no

72 seasonal variation.<sup>23</sup> Rachmadi et al.<sup>24</sup> studied the persistence of endogenous PMMoV RNA using  
73 RT-qPCR in constructed wetlands and found limited decay at three temperatures (4 °C, 22 °C,  
74 and 37 °C) for 21 days, suggesting it is highly persistent. Given that PMMoV RNA  
75 concentrations are used in wastewater monitoring programs to normalize SARS-CoV-2 RNA  
76 concentrations, studying its persistence relative to SARS-CoV-2 targets is important. To date, no  
77 study has measured the persistence of PMMoV RNA in wastewater or primary settled solids.

78  
79 In this study, we measured the first-order decay rate constant of SARS-CoV-2 (N1 and N2  
80 targets) and PMMoV RNA in primary settled solids from two different wastewater treatment  
81 plants. Primary settled solids samples were stored at three temperatures (4°C, 22°C, and 37°C),  
82 which represent typical environmental conditions from cold, temperate, and tropical regions. We  
83 also assessed the effects of temperature and wastewater treatment plant on the decay rate  
84 constants and compared the decay rate constants for SARS-CoV-2 RNA in primary settled solids  
85 to previously reported decay rate constants in wastewater.

86

## 87 **Materials & Methods**

### 88 *Study area and sample collection*

89 Primary settled solids samples were collected from the San José-Santa Clara Regional  
90 Wastewater Facility (POTW A) and Sacramento Regional Wastewater Treatment Plant (POTW  
91 B) on August 9, 2021. POTW A is an advanced-secondary treatment plant located in Santa Clara  
92 County, California, USA. The plant serves approximately 1.4 million people and processes an  
93 average flow of 110 million gallons per day (MGD). The residence time in the sewer network is  
94 around 4-18 hours. Approximately 10 mg/L of FeCl<sub>3</sub> is added prior to the headworks for odor

95 control. The residence time of solids in the primary clarifier is estimated to be 1-2 hours. POTW  
96 B is a secondary treatment plant located in Sacramento County, California, USA. The plant serves  
97 approximately 1.6 million people and processes an average flow of 124 MGD. The residence time  
98 in the sewer network is approximately 15 hours and the residence time of solids in the primary  
99 clarifier is estimated to be 1 hour.

100

101 A 24-hour composite sample (500 mL gathered every 4 hours) was collected from the primary  
102 sludge line of POTW A. For POTW B, a 2 L grab sample was collected from the primary sludge  
103 line. Both samples were collected in 10% HCl acid-washed plastic containers and stored on ice  
104 during transportation to the laboratory.

105

### 106 *Sample processing*

107 Sample processing began within 24 hours of sample collection. Samples from each POTW were  
108 thoroughly mixed and aliquoted into 50 mL conical tubes, for a total of 32 subsamples per  
109 POTW. Each time point had a biological replicate. Subsamples were then placed inside opaque  
110 boxes (to shield samples from light) and placed into constant temperature rooms at 4°C, 22°C,  
111 and 37°C. Two subsamples were processed immediately to determine the initial concentrations of  
112 PMMoV and SARS-CoV-2 RNA at time zero (t=0). Another subsample was reserved for percent  
113 solids analysis which required heating the sample at 105°C for 24 hours and comparing the  
114 weight before and after drying. Table S3 includes the percent of solids measured in primary  
115 settled solid samples collected from each POTW.

116

117 On days 2, 4, 6, 8, and 10, subsamples were retrieved from each temperature condition. Each 50  
118 mL conical tube was centrifuged at 4,200 rpm for 40 minutes at 4°C. The supernatant was  
119 decanted and about 0.225 g of solids were aliquoted into 15 ml conical tubes. Solids were  
120 immediately resuspended with 3 mL of DNA/RNA Shield (Zymo Research; cat. no. R1100-250)  
121 to prevent further degradation and preserve the genetic integrity of the subsamples. The final  
122 concentration of dewatered solids resuspended in spiked DNA/RNA Shield was approximately 75  
123 mg/ml. This concentration of solids was chosen as it was found to alleviate inhibition in the  
124 downstream RT-ddPCR.<sup>25</sup> All subsamples were spiked with 4.5 µL of bovine coronavirus vaccine  
125 (Zoetis; #CALF-GUARD) to estimate viral RNA extraction efficiencies. RNA extracts needed to  
126 have at least a 10% recovery efficiency to be included in the analysis, otherwise they were  
127 excluded from the data analysis.

128

### 129 ***RNA extraction***

130 RNA was extracted from subsamples in two batches. Subsamples in Batch 1 (t = 0, 2, and 4) were  
131 processed on 13 August 2021 and Batch 2 (t = 6, 8, and 10) on 20 August 2021. RNA extraction  
132 was performed following the high throughput RNA extraction and PCR inhibitor removal  
133 protocol for settled solids.<sup>26</sup> Briefly, RNA was extracted from 300 µl of a homogenized sample  
134 using the Chemagic™ Viral DNA/RNA 300 Kit H96 for the Perkin Elmer Chemagic 360  
135 followed by PCR Inhibitor Removal with the Zymo OneStep-96 PCR Inhibitor Removal Kit. Two  
136 extraction replicates were completed for each subsample. Extraction negative controls consisted  
137 of DNase/RNase-free water. Extraction positive controls consisted of DNA/RNA Shield solution  
138 spiked with SARS-CoV-2 genomic RNA (ATCC® VR-1986D™) and bovine coronavirus

139 (BCoV). Each RNA extract was aliquoted into separate 1.5 ml DNA LoBind tubes and stored at -  
140 80°C until quantification; samples were stored for approximately 10 days.

141

#### 142 ***ddRT-PCR***

143 The concentration of SARS-CoV-2 N1 and N2, PMMoV, and BCoV was determined in each  
144 subsample. N1 and N2 were quantified in a duplex assay using the One-Step RT-ddPCR  
145 Advanced kit for probes (BioRad; cat. no. 1864021). Each 22- $\mu$ L reaction consisted of 1X  
146 BioRad Supermix, 1X reverse transcriptase, 15 mM DTT, 0.9  $\mu$ M of each primer, 0.25  $\mu$ M of  
147 each probe, and 5.5  $\mu$ L template RNA. Primers and probes are listed in Table S2. An individual  
148 RNA extract was used for the N1/N2 assay. RNA extracts were run undiluted and six technical  
149 replicates (6 ddRT-PCR wells) were merged for analysis. Negative (Mastermix + DNase/RNase-  
150 free water) and positive (SARS-CoV-2 genomic RNA ATCC® VR-1986D™) RT-ddPCR  
151 controls were included on each plate. Negative and positive extraction controls were also  
152 processed for each RNA extraction batch.

153

154 A separate RNA extract (extraction replicate) was used for the PMMoV/BCoV assays to prevent  
155 freeze-thaw effects in the detection of RNA targets. The duplex assay was performed using the  
156 One-Step RT-ddPCR Advanced kit for probes (BioRad; cat. no. 1864021) consisting of 1X  
157 BioRad Supermix, 1X reverse transcriptase, 15 mM of dithiothreitol (DTT), 0.9  $\mu$ M of each  
158 primer, 0.4  $\mu$ M of PMMoV probe, 0.25  $\mu$ M of BCoV probe, and 5.5  $\mu$ L template RNA. RNA  
159 extracts were diluted 1:100 before ddRT-PCR and two technical replicates (2 ddRT-PCR wells)  
160 were merged for analysis. Negative controls (Mastermix + DNase/RNase-free water) and positive  
161 controls (a mixture of PMMoV oligos (IDT) and BCoV amplicons generated from end-point

162 PCR) were included on each RT-ddPCR plate. Negative and positive extraction controls were  
163 also processed for each RNA extraction batch. Results from the extraction positive control  
164 (DNA/RNA Shield spiked with BCoV) were used to estimate the extraction efficiency for each  
165 subsample.  
166  
167 Reagents were pipetted into 96-well plates, sealed using a PX1 PCR plate sealer, and vortexed for  
168 30 seconds. Droplets were generated using an AutoDG (BioRad) using automated droplet  
169 generation oil for probes (BioRad; cat. no.1864110). Once droplets were generated, plates were  
170 sealed and placed onto a thermocycler within 30 minutes of generation. N1/N2 assay plates were  
171 thermocycled as follows: 50°C for 60 minutes, 95°C for 10 minutes, 40 cycles of 94°C for 30  
172 seconds then 55°C for 1 minute, followed by 98°C for 10 minutes, and 4°C for at least 30  
173 minutes. PMMoV/BCoV plates were thermocycled as follows: 50°C for 60 minutes, 95°C for 10  
174 minutes, 40 cycles of 94°C for 30 seconds then 56°C for 1 minute, followed by 98°C for 10  
175 minutes, and 4°C for at least 30 minutes. Plates were moved to a QX200 droplet reader (BioRad)  
176 within 48 hours of thermocycling. RT-ddPCR data was manually thresholded and exported using  
177 the QuantaSoft and QuantaSoft Analysis Pro (BioRad) Software. Droplets were visually inspected  
178 and classified following the SARS-CoV-2 and BCoV/PMMoV post-processing analysis  
179 procedure described in Wolfe et al.<sup>27</sup> RT-ddPCR outputs were also converted to copies per g of  
180 dry weight using dimensional analysis.<sup>27</sup>

181

## 182 ***Data analysis***

183 Dimensional and statistical analyses were performed using Microsoft Excel and Rstudio (version  
184 4.1.2). First-order decay constants (k) were calculated for experiments at each temperature and



185 POTW using the average concentration of SARS-CoV-2 and PMMoV RNA at each time point  
186 (day 0, 2, 4, 6, 8, and 10).  $k$  and the time needed to achieve a 90% reduction in concentration  
187 ( $T_{90}$ ) were calculated using the following equations:

188

$$189 \quad C_t = C_0 e^{-kt} \quad (\text{Eq. 1})$$

190

$$191 \quad T_{90} = -\frac{\ln(0.1)}{k} \quad (\text{Eq. 2})$$

192

193 where  $C_t$  is the concentration of the viral RNA at time  $t$ ,  $C_0$  is the concentration of viral RNA at  
194 time zero, and  $k$  is the first-order decay constant.  $k$  was calculated as the slope of  $\ln(C_t/C_0)$  over  
195 time using a linear least-squares regression model in R. Goodness of fit of the linear regression  
196 model was assessed by determining the coefficient of determination ( $r^2$ ) and by visually  
197 inspecting the normality and homogeneity of variance of the residuals vs fitted values and Q-Q  
198 plots. A Shapiro-Wilk test was also performed to assess the normality assumption.

199

200 A multiple linear regression model (Eq. 3) was used to model the means of  $k$  as a function of  
201 temperature, RNA target, and POTW and to determine which factors had a significant main effect  
202 on  $k$ . Interaction effects were also included (discussed in results). All analyses were performed in  
203 Rstudio using the “lm” function. The initial regression model was then modified to include only  
204 factors that had a significant effect on  $k$ :

205

$$206 \quad k = \beta_0 + \sum_i^n \beta_i x_i + \varepsilon \quad (\text{Eq. 3})$$

207

208 where  $\beta_0$  is the intercept,  $\beta_i$  is the regression coefficient for each factor  $x_i$  (temperature, RNA  
209 target, and POTW), and  $\varepsilon$  is the residual standard error of the model.  $\log_{10}k$  values of SARS-CoV-  
210 2 RNA from this study were also compared to previously reported  $\log_{10}k$  values of SARS-CoV-2  
211 RNA in wastewater using a linear regression model in R.  $\log_{10}k$  values were used in that analysis  
212 because previous work has shown an exponential relationship between  $k$  and temperature for  
213 viruses in environmental waters.<sup>28,29</sup>  $P < 0.05$  was used to assess statistical significance.

214

## 215 **Results**

216 **QA/QC.** This study takes into consideration the control and process checklist provided in the  
217 Environmental Microbiology Minimum Information (EMMI) guidelines<sup>30</sup>. Extraction and RT-  
218 ddPCR positive and negative controls were positive and negative, respectively, for all viral RNA  
219 targets. The median BCoV recovery was 60% across all primary settled solids samples (POTW A:  
220 median = 55% and POTW B: median = 66%). All extractions were above 10% recovery and  
221 included in the analysis. BCoV is used solely as a process and gross inhibition control; no attempt  
222 was made to correct concentrations by recovery owing to the complexities associated with  
223 estimating viral RNA recovery using surrogate viruses.<sup>31</sup>

224

225 **Decay rate model.** Limited decay ( $< 1 \log_{10}$  reduction over 10 days) was observed for all RNA  
226 targets and at all temperature conditions. Table 2 shows the first-order decay rate constants and  
227 time needed to achieve a 90% reduction in concentration for SARS-CoV-2 (N1 and N2 targets)  
228 and PMMoV RNA.  $k$  was significantly different from 0 for all conditions ( $p < 0.05$ ) and varied  
229 from 0.010 to 0.091  $\text{day}^{-1}$  depending on the RNA target and temperature conditions. The linear  
230 model was a good fit for most decay curves (median  $r^2 = 0.60$ , median RMSE = 0.21; Table 2);

231 however, some experiments had  $r^2$  less than 0.3. These same experiments had small RMSE and  
232 very small  $k$  values indicative of limited decay with time. Residual values from the model  
233 exhibited a random pattern which suggests that the linear relationship assumption is reasonable.

234  
235 **SARS-CoV-2 RNA first-order decay rate constants.** The initial average concentrations (mean  $\pm$   
236 standard deviation) of N1 were  $4.48 \pm 3.93$  and  $4.60 \pm 3.69 \log_{10}$  copies/g of dry weight at POTW  
237 A and POTW B, respectively. For N2, the average initial concentrations were  $4.45 \pm 3.89 \log_{10}$   
238 copies/g of dry weight at POTW A and  $4.55 \pm 3.56 \log_{10}$  copies/g of dry weight at POTW B.  
239 Figure 1 shows the decay curves of all RNA targets in primary settled solids and Table 2  
240 summarizes the first-order decay constants and  $T_{90}$  for all RNA targets and temperature  
241 conditions. For N1,  $k$  values at POTW A and B were  $0.024$  and  $0.036 \text{ day}^{-1}$  at  $4 \text{ }^\circ\text{C}$ ,  $0.027$  and  
242  $0.063 \text{ day}^{-1}$  at  $22 \text{ }^\circ\text{C}$ , and  $0.063$  and  $0.91 \text{ day}^{-1}$  at  $37 \text{ }^\circ\text{C}$ , respectively. At POTW A, the time  
243 needed to achieve a 90% reduction in N1 concentration was approximately 95 days at  $4 \text{ }^\circ\text{C}$ , 86  
244 days at  $22 \text{ }^\circ\text{C}$ , and 37 days at  $37 \text{ }^\circ\text{C}$ . N1  $T_{90}$  values at POTW B were approximately 65, 36, and 25  
245 days, depending on temperature conditions. N2  $k$  values at POTW A and B were  $0.011$  and  $0.031$   
246  $\text{day}^{-1}$  at  $4 \text{ }^\circ\text{C}$ ,  $0.021$  and  $0.089 \text{ day}^{-1}$  at  $22 \text{ }^\circ\text{C}$ , and  $0.047$  and  $0.98 \text{ day}^{-1}$  at  $37 \text{ }^\circ\text{C}$ , respectively. At  
247 POTW A, N2  $T_{90}$  values were 215, 107, and 49 days, depending on temperature. At POTW B, N2  
248  $T_{90}$  values were 65, 36, 25 days depending on temperature.

249  
250 **PMMoV RNA first-order decay rate constants.** The initial mean concentrations (mean  $\pm$   
251 standard deviation) of PMMoV were  $8.32 \pm 7.63$  and  $8.28 \pm 7.86 \log_{10}$  copies/g of dry weight at  
252 POTW A and POTW B, respectively. Similar to SARS-CoV-2 RNA targets, limited decay was  
253 observed for PMMoV RNA at all temperature conditions over 10 days.  $k$  values at POTW A and

254 B were 0.010 and 0.059 day<sup>-1</sup> at 4 °C, 0.040 and 0.077 day<sup>-1</sup> at 22 °C, and 0.045 and 0.091 day<sup>-1</sup> at  
255 37 °C, respectively. Based on these results, T<sub>90</sub> would be 237, 57, and 52 days at POTW A and  
256 39, 30, and 25 days at POTW B depending on temperature conditions.

257  
258 **Multiple linear regression models for k in primary settled solids.** The initial multiple  
259 regression model (where k is a function of temperature, RNA target, and POTW) indicates that  
260 RNA target (SARS-CoV-2 N1, N2, or PMMoV) is not a significant factor in the model.  
261 Temperature and POTW were significant ( $p < 0.05$ ) factors, therefore the regression model was  
262 modified to only include these variables, and the interaction term (temperature x POTW) was  
263 added to the model. Temperature and POTW remained significant factors in the modified model  
264 ( $p = 0.0006$  and  $p = 0.06$ , respectively) but the interaction term was not significant. The interaction  
265 term was therefore removed from the regression model and rerun with just POTW and  
266 temperature as factors. The intercept ( $\beta_0$ ) and coefficients ( $\beta_{\text{temp}}$  and  $\beta_{\text{POTW}}$ ) of the final regression  
267 model were 0.004 per day, 0.001 per day per °C, and 0.039 per day, respectively. The residual  
268 standard error of the regression model was 0.01 per day and adjusted  $r^2$  was 0.87 ( $p < 10^{-7}$ ). The  
269 positive regression coefficients indicate that k increases with temperature (Figure 2), and that k is  
270 higher at POTW B compared to POTW A (as POTW A was coded as the reference POTW in  
271 equation 3).

272  
273 **Decay rate of SARS-CoV-2 RNA in primary settled solids versus wastewater.** Figure 2 shows  
274  $\log_{10}k$  values of SARS-CoV-2 RNA (N1 and N2 targets) in primary settled solids from this study  
275 and previously reported  $\log_{10}k$  values of SARS-CoV-2 RNA (N1, N2, and E targets) in  
276 wastewater samples stored at 4 - 37 °C for various durations of time (Table 1). The slope of  $\log_{10}k$

277 versus temperature was similar for experiments conducted in primary settled solids (this study)  
278 and wastewater (0.0149 vs 0.0145). However, a lower y-intercept was observed for primary  
279 settled solids compared to wastewater samples (-1.70 vs -0.83).  $\log_{10}k$  values for SARS-CoV-2  
280 RNA in primary settled solids has a positive correlation with temperature ( $r^2 = 0.49$ ,  $p = 0.01$ ).  
281 However, a poor fit was achieved for the linear regression model that regressed  $\log_{10}k$  values and  
282 temperature from various studies that used wastewater influent ( $r^2 = 0.07$ ,  $p = 0.29$ ).

283

## 284 **Discussion**

285 SARS-CoV-2 and PMMoV RNA can be highly persistent in primary settled solids. The  
286 persistence of viral RNA targets and infectious viruses can be influenced by the physical,  
287 chemical, and biological characteristics of wastewater. These factors include temperature, pH,  
288 organic matter, dissolved oxygen, solid content, and microbial activity.<sup>19,29,32</sup> In this study, the  
289 decay rate constants of all RNA targets increased with temperature, which is consistent with  
290 previous studies of viral decay in the environment.<sup>13-17,24</sup> However, limited information is  
291 available on how solid content in wastewater and primary settled solids can influence the decay  
292 rate constants of SARS-CoV-2 and PMMoV RNA. In this study, faster decay rates were observed  
293 for RNA targets at POTW B compared to POTW A. Primary settled solid samples from POTW B  
294 had a greater percentage of solids (16.57% vs 14.07%) and initial concentration of PMMoV RNA  
295 compared to POTW A, which might suggest a higher concentration of fecal matter. Further  
296 research is needed to better understand the factors that influence the decay of these targets in the  
297 environment.

298

299 Decay rate constants of SARS-CoV-2 RNA from this study were compared to previous rate  
300 constants of SARS-CoV-2 RNA in wastewater influent. The linear model of  $\log_{10}k$  values of  
301 SARS-CoV-2 RNA as a function of temperature displays comparable slopes for experiments  
302 conducted using primary settled solids and wastewater influent samples, suggesting that the RNA  
303 targets have similar sensitivity to temperature in both matrices. Figure 2 also suggests that SARS-  
304 CoV-2 RNA is more persistent in primary settled solids compared to wastewater. In this study,  
305  $T_{90}$  values for SARS-CoV-2 RNA ranged from 24 - 214 days, depending on temperature  
306 conditions and POTW. These values were higher than previously reported  $T_{90}$  values for SARS-  
307 CoV-2 RNA in wastewater (ranging from 0.5 - 52 days) at similar temperature conditions.  
308  
309 Decay rate constants for N1, N2, and PMMoV RNA targets (all ~70 bp in length) were not  
310 significantly different from each other and quite small. These RNA targets may be located on  
311 intact genomes inside of virus capsids and envelopes (for N1 and N2), fragmented genomes inside  
312 damaged capsids, or exterior to the virus capsid. Wurtzer et al.<sup>33</sup> showed that SARS-CoV-2 RNA  
313 can exist in diverse forms in wastewater whereas Robinson et al.<sup>34</sup> indicate that SARS-CoV-2  
314 targets are likely to be present within lipid envelopes in wastewater. Other studies have examined  
315 the persistence of viral RNA targets in the environment and generally found the RNA targets are  
316 more persistent than infectious viruses as measured using host cell lines.<sup>14,29</sup> While RNA is  
317 generally believed to be quite labile, Walters et al.<sup>35</sup> showed that the RT-PCR target of naked  
318 enterovirus RNA was persistent in seawater microcosms and present for up to 15 days. Research  
319 is needed to better understand RNA persistence in the environment, especially as molecular  
320 biology methods for quantifying viral nucleic acids in the environment become more accessible  
321 and affordable for public health surveillance.

322

323 It should be noted that SARS-CoV-2 has not been cultured from raw wastewater<sup>34</sup> therefore the  
324 scientific evidence to date indicates that detection of RNA in these samples is not associated with  
325 infectious viral particles. Moreover, the decay rate constants reported herein are not to be  
326 misinterpreted as decay rate constants for infectious SARS-CoV-2. Bivins et al.<sup>14</sup> measured decay  
327 rate constants of infectious SARS-CoV-2 seeded into wastewater and found  $T_{90} = 1.6$  to 2.1 days;  
328 they observed longer persistence of SARS-CoV-2 RNA in the same experiment  $T_{90} = 3.3$  to 26.2  
329 days.

330

331 This is the first study that estimates the decay rate of PMMoV RNA in primary settled solids or  
332 any wastewater-related matrix. PMMoV is naturally found in human feces, wastewater, and  
333 primary settled samples and previous studies have found that the molecular signal of PMMoV is  
334 remarkably temporally stable in wastewater with almost no seasonal variation throughout the  
335 year.<sup>23</sup> For example, Rachmadi et al.<sup>24</sup> studied the persistence of endogenous PMMoV RNA in  
336 constructed wetlands and observed limited decay at 4 °C, 22 °C, and 37 °C for over 21 days.  
337 Interestingly, the k values reported in constructed wetlands are similar to those reported here for  
338 settled solids; 0.04-0.08 days<sup>-1</sup> in wetland waters and 0.01-0.09 days<sup>-1</sup> in primary settled solids  
339 samples stored at 4- 37°C.

340

341 At the moment, most SARS-CoV-2 RNA decay experiments in the literature have spiked  
342 wastewater samples with different strains of SARS-CoV-2 and in some instances, inactivated the  
343 external source of SARS-CoV-2 using gamma-radiation as a safety precaution. This was  
344 necessary to ensure a high initial concentration in wastewater samples, so that decay could be

345 followed. Only one previous study<sup>17</sup> measured the decay rate of endogenous SARS-CoV-2 RNA  
346 in wastewater, with  $T_{90}$  values ranging from 0.5 – 2.4 days for wastewater influent samples stored  
347 at 4-35°C. These results are noticeably lower compared to previous experiments conducted using  
348 surrogate spikes of SARS-CoV-2 that reported  $T_{90}$  values ranging from 3.4-52 days for samples  
349 stored at 4-37°C. Limited information is available on how the decay rate constants of endogenous  
350 SARS-CoV-2 and spiked SARS-CoV-2 surrogates differ in wastewater and primary settled solid  
351 samples. Chik et al.<sup>18</sup> found that surrogate spikes of SARS-CoV-2 may exhibit different solid-  
352 liquid partitioning behaviors compared to endogenous SARS-CoV-2. Therefore, spiking samples  
353 with an external source of SARS-CoV-2 may not necessarily represent natural conditions of  
354 SARS-CoV-2 present in wastewater and primary settled solids.

355  
356 Only a few constraints were encountered during the execution of this experiment. After  
357 concentrating and dewatering the subsamples, solids were immediately resuspended in  
358 DNA/RNA Shield and stored at 4°C for up to 5 days before extraction. Ideally, samples should be  
359 processed as soon as possible. However, the DNA/RNA Shield acts to preserve the integrity of  
360 the RNA in the solids and prevent its further degradation; and the results of this study suggest  
361 negligible decay of RNA targets at 4°C in the absence of the DNA/RNA Shield. Another possible  
362 constraint is that limited decay (< 1 log<sub>10</sub> reduction) was observed in the detection of all RNA  
363 targets through this study. The length of the study was selected based on the average hydraulic  
364 residence time of the sewer network (<24 hours) and the average residence time of solids in  
365 primary clarifiers (<12 hours) in this study. Future studies could consider experimental durations.

## 366 **Conclusion**

367 This study fills critical knowledge gaps regarding the persistence of SARS-CoV-2 and PMMoV



368 RNA in wastewater settled solids. We find that SARS-CoV-2 and PMMoV RNA can be highly  
369 persistent in primary settled solids for several weeks and even months depending on temperature  
370 conditions. Results from this study and previous studies of SARS-CoV-2 RNA in wastewater  
371 suggest limited decay of viral nucleic acids during their transit through the sewer network and  
372 within the primary clarifiers, as the time scales of transit in these systems are usually less than 48  
373 hours. This conclusion relies on the assumption that the persistence of the RNA targets in the  
374 solids obtained from the primary clarifier is similar to that of the RNA targets on solids suspended  
375 in wastewater as it transits through the sewage network. The  $k$  values reported herein will be  
376 particularly useful in models that link SARS-CoV-2 RNA in settled solids to COVID-19  
377 incidence rates in sewersheds, and aid in the interpretation of SARS-CoV-2 RNA concentrations  
378 in settled solids for applications in wastewater-based epidemiology. Future experiments should  
379 investigate the decay of other targets used for wastewater-based epidemiology including  
380 respiratory syncytial virus (RSV).<sup>36</sup>

### 381 **Acknowledgments**

382 This study was funded by a gift from the CDC Foundation. We acknowledge the following  
383 individuals for assistance with wastewater solids collection: Payal Sarkar (SJ), Noel Enok (SJ), and  
384 Amy Wong (SJ); Srividhya Ramamoorthy (Sac), Michael Cook (Sac), Ursula Bigler (Sac), James  
385 Noss (Sac), and Lisa C. Thompson (Sac). The graphical abstract was created with BioRender.com.

386  
387 **Supporting Information.** Tables S1, S2, and S3 show the systematic review process, primer  
388 design criteria, and characteristics of wastewater treatment plants and primary settled solid  
389 samples, respectively.

390

391 **Competing Interests.** DD is an employee of Verily Life Sciences.

392

393

394

395 **Table 1: First-order decay rate constants (k) and time needed to achieve 90% reduction (T<sub>90</sub>) of SARS-**  
 396 **CoV-2 and PMMoV in wastewater and environmental waters stored at 4-37°C. Papers included were**  
 397 **identified in the systematic review described in the SI.**

| Reference             | Target                          | Matrix              | Sample preparation                                                                                                     | Temp. (°C)          | k (days <sup>-1</sup> )          | T <sub>90</sub> (days)       |
|-----------------------|---------------------------------|---------------------|------------------------------------------------------------------------------------------------------------------------|---------------------|----------------------------------|------------------------------|
| Ahmed et al. 2020     | SARS-CoV-2 RNA (N1 gene)        | wastewater influent | Samples were spiked with gamma-irradiated SARS-CoV-2 (hCoV-19/Australia/VIC01/2020)                                    | 4<br>15<br>25<br>37 | 0.084<br>0.114<br>0.183<br>0.286 | 27.8<br>20.4<br>12.6<br>8.04 |
|                       | SARS-CoV-2 RNA (N1 gene)        | wastewater influent | Samples were autoclaved and spiked with gamma-irradiated SARS-CoV-2 (hCoV-19/Australia/VIC01/2020)                     | 4<br>15<br>25<br>37 | 0.054<br>0.077<br>0.171<br>0.405 | 42.6<br>29.9<br>13.5<br>5.7  |
| Bivins et al. 2020    | SARS-CoV-2 RNA (E gene)         | wastewater influent | Samples were immediately frozen after collection, then thawed and spiked with SARS-CoV-2 (nCoV-WA1-2020; MN985325.1)   | 20                  | 0.09, 0.67                       | 25.6, 3.4                    |
|                       | Infectious SARS-CoV-2 virus     | wastewater influent | Samples were immediately frozen after collection, then thawed and spiked with SARS-CoV-2 (nCoV-WA1-2020; MN985325.1)   | 20                  | 1.1, 1.4                         | 2.1, 1.6                     |
| Hokajärvi et al. 2021 | SARS-CoV-2 RNA (E gene)         | wastewater influent | Samples were spiked with SARS-CoV-2 (strain not specified).                                                            | 4                   | 0.04                             | 52                           |
|                       | SARS-CoV-2 RNA (N2 gene)        | wastewater influent | Samples were spiked with SARS-CoV-2 (strain not specified).                                                            | 4                   | 0.06                             | 36                           |
| Weidhaas et al. 2021  | SARS-CoV-2 RNA (N1 and N2 gene) | wastewater influent | Study conducted with endogenous SARS-CoV-2.                                                                            | 4<br>10<br>35       | 0.96, 2.16<br>2.16<br>4.32       | 2.4, 1.1<br>1.1<br>0.5       |
| Oliveira et al. 2021  | Infectious SARS-CoV-2 virus     | wastewater influent | Samples were autoclaved and spiked with SARS-CoV-2 (SARS.CoV2/SP02.2020.HIAE.Br)                                       | 4<br>24             | 0.19<br>0.83                     | 12.1<br>2.9                  |
|                       | Infectious SARS-CoV-2 virus     | wastewater influent | Samples were autoclaved, filtered through a 0.22 µm membrane, and spiked with SARS-CoV-2 (SARS.CoV2/SP02.2020.HIAE.Br) | 24                  | 0.80                             | 2.8                          |
| Rachmadi et al. 2016  | PMMoV RNA                       | wetland water       | Study conducted with endogenous PMMoV.                                                                                 | 4<br>25<br>37       | 0.04<br>0.05<br>0.08             | 57.6<br>46.1<br>28.8         |

398

**Table 2: SARS-CoV-2 and PMMoV RNA first-order decay constant (k) and T<sub>90</sub> in primary settled solids sample from POTW A and POTW B**

| Target | Temperature (°C) | POTW A                              |                                    |                |                            | POTW B                              |                                    |                |                            |
|--------|------------------|-------------------------------------|------------------------------------|----------------|----------------------------|-------------------------------------|------------------------------------|----------------|----------------------------|
|        |                  | k (days <sup>-1</sup> ) (mean ± SD) | T <sub>90</sub> (days) (mean ± SD) | r <sup>2</sup> | RMSE (days <sup>-1</sup> ) | k (days <sup>-1</sup> ) (mean ± SD) | T <sub>90</sub> (days) (mean ± SD) | r <sup>2</sup> | RMSE (days <sup>-1</sup> ) |
| N1     | 4                | 0.024 ± 0.008                       | 95 ± 31.5                          | 0.64           | 0.16                       | 0.036 ± 0.012                       | 64.6 ± 21.8                        | 0.64           | 0.11                       |
|        | 22               | 0.027 ± 0.013                       | 85.9 ± 42.7                        | 0.45           | 0.28                       | 0.063 ± 0.021                       | 36.5 ± 12.1                        | 0.65           | 0.18                       |
|        | 37               | 0.063 ± 0.016                       | 36.6 ± 9.3                         | 0.76           | 0.27                       | 0.091 ± 0.020                       | 25.3 ± 5.6                         | 0.80           | 0.21                       |
| N2     | 4                | 0.011 ± 0.009                       | 214.7 ± 181.0                      | 0.22           | 0.13                       | 0.031 ± 0.010                       | 75.4 ± 24.6                        | 0.67           | 0.12                       |
|        | 22               | 0.021 ± 0.016                       | 107.3 ± 83.5                       | 0.26           | 0.31                       | 0.089 ± 0.023                       | 26.0 ± 6.7                         | 0.74           | 0.22                       |
|        | 37               | 0.047 ± 0.018                       | 49.4 ± 19.1                        | 0.57           | 0.29                       | 0.098 ± 0.018                       | 23.5 ± 4.3                         | 0.80           | 0.25                       |
| PMMoV  | 4                | 0.010 ± 0.007                       | 237.4 ± 212.9                      | 0.27           | 0.08                       | 0.059 ± 0.027                       | 39.0 ± 17.8                        | 0.48           | 0.28                       |
|        | 22               | 0.040 ± 0.021                       | 57.2 ± 29.9                        | 0.43           | 0.37                       | 0.077 ± 0.006                       | 30.1 ± 2.4                         | 0.97           | 0.10                       |
|        | 37               | 0.045 ± 0.013                       | 51.7 ± 15.0                        | 0.71           | 0.27                       | 0.091 ± 0.020                       | 25.3 ± 5.6                         | 0.80           | 0.17                       |

SD: Standard deviation across biological replicates

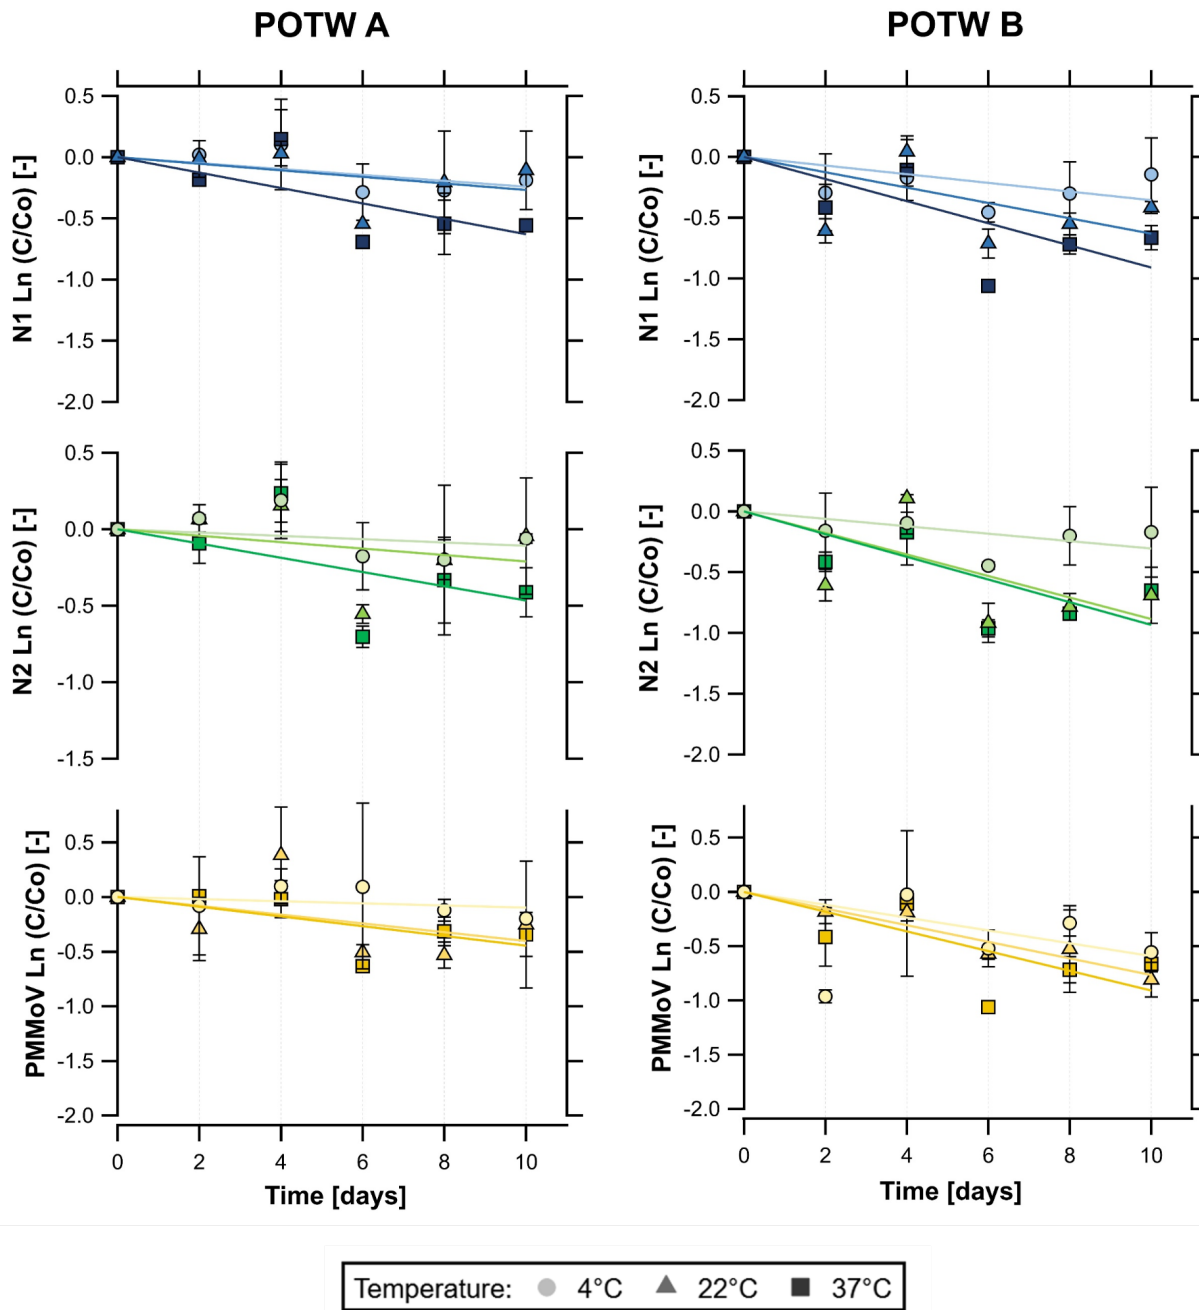

**Figure 1: Decay curves of SARS-CoV-2 RNA (N1 and N2) and PMMoV RNA over time (days) in primary settled solids samples stored at 4, 22, and 37 °C. Left column: results from the San José-Santa Clara Regional Wastewater Facility (POTW A). Right column: results from the Sacramento Regional Wastewater Treatment Plant (POTW B). Error bars represent the standard deviation across biological replicates (n = 2).**

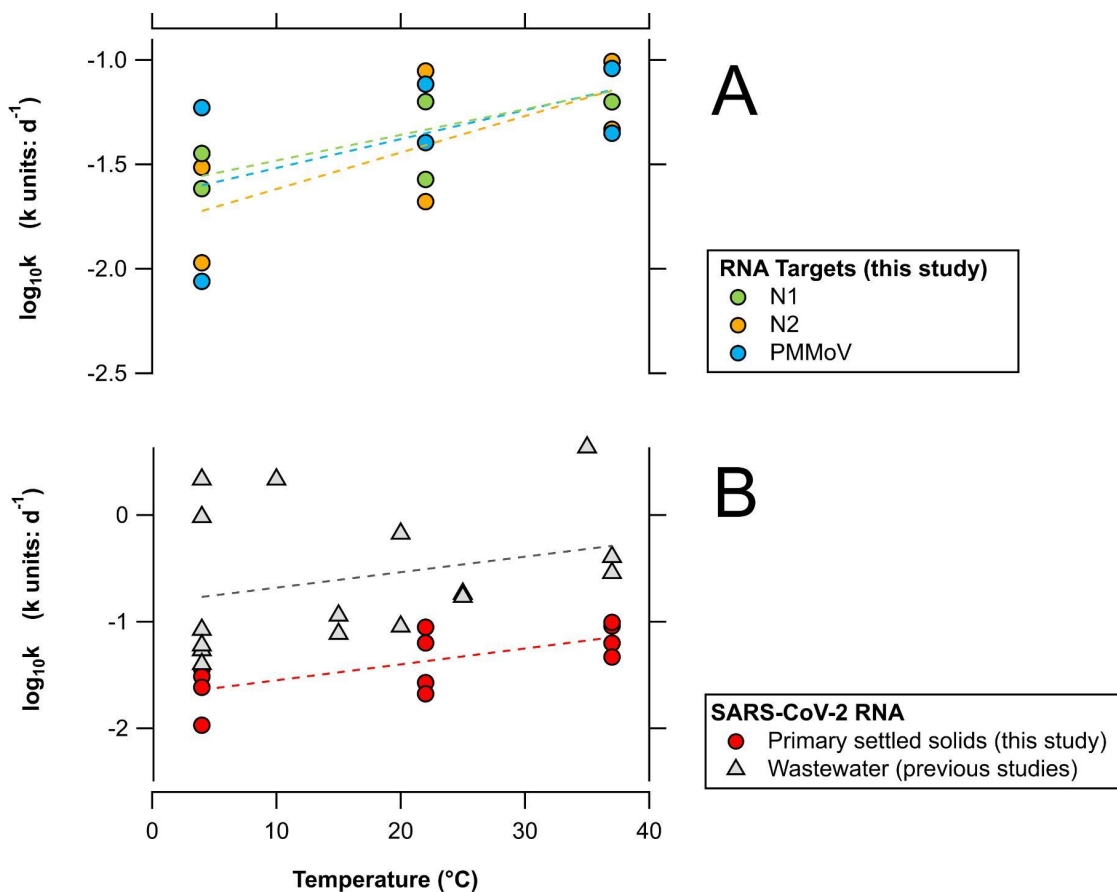

**Figure 2: Panel A:  $\log_{10} k$  of SARS-CoV-2 N1, N2, and PMMoV RNA in primary settled solids from this study stored at 4, 22, and 37  $^{\circ}\text{C}$ . Panel B:  $\log_{10} k$  of SARS-CoV-2 RNA in primary settled solids (this study) and wastewater samples (previous studies) stored at 4-37  $^{\circ}\text{C}$ . Dashed lines represent the linear regression models for each target. Individual  $k$  values are summarized in Table 1 (results from previous studies) and Table 2 (results from this study).**

## References

- (1) Kim, S.; Kennedy, L.; Wolfe, M.; Criddle, C.; Duong, D.; Topol, A.; White, B. J.; Kantor, R.; Nelson, K.; Steele, J.; Langlois, K.; Griffith, J.; Zimmer-Faust, A.; McLellan, S.; Schussman, M.; Armmerman, M.; Wigginton, K.; Bakker, K.; Boehm, A. *SARS-CoV-2 RNA Is Enriched by Orders of Magnitude in Solid Relative to Liquid Wastewater at Publicly Owned Treatment Works*; preprint; Infectious Diseases (except HIV/AIDS), 2021. <https://doi.org/10.1101/2021.11.10.21266138>.
- (2) Li, B.; Di, D. Y. W.; Saingam, P.; Jeon, M. K.; Yan, T. Fine-Scale Temporal Dynamics of SARS-CoV-2 RNA Abundance in Wastewater during A COVID-19 Lockdown. *Water Research* **2021**, *197*, 117093. <https://doi.org/10.1016/j.watres.2021.117093>.
- (3) Peccia, J.; Zulli, A.; Brackney, D. E.; Grubaugh, N. D.; Kaplan, E. H.; Casanovas-Massana, A.; Ko, A. I.; Malik, A. A.; Wang, D.; Wang, M.; Warren, J. L.; Weinberger, D. M.; Arnold, W.; Omer, S. B. Measurement of SARS-CoV-2 RNA in Wastewater Tracks Community Infection Dynamics. *Nat Biotechnol* **2020**, *38* (10), 1164–1167. <https://doi.org/10.1038/s41587-020-0684-z>.
- (4) D'Aoust, P. M.; Mercier, É.; Montpetit, D.; Jia, J.-J.; Alexandrov, I.; Neault, N.; Baig, A. T.; Mayne, J.; Zhang, X.; Alain, T.; Langlois, M.-A.; Servos, M. R.; MacKenzie, M.; Figeys, D.; MacKenzie, A. E.; Graber, T. E.; Delatolla, R. Quantitative Analysis of SARS-CoV-2 RNA from Wastewater Solids in Communities with Low COVID-19 Incidence and Prevalence. *Water Research* **2020**, 116560. <https://doi.org/10.1016/j.watres.2020.116560>.
- (5) Wolfe, M. K.; Archana, A.; Catoe, D.; Coffman, M. M.; Dorevich, S.; Graham, K. E.; Kim, S.; Grijalva, L. M.; Roldan-Hernandez, L.; Silverman, A. I.; Sinnott-Armstrong, N.; Vugia, D. J.; Yu, A. T.; Zambrana, W.; Wigginton, K. R.; Boehm, A. B. Scaling of SARS-CoV-2 RNA in Settled Solids from Multiple Wastewater Treatment Plants to Compare Incidence Rates of Laboratory-Confirmed COVID-19 in Their Sewersheds. *Environ. Sci. Technol. Lett.* **2021**, *8* (5), 398–404. <https://doi.org/10.1021/acs.estlett.1c00184>.
- (6) Graham, K. E.; Loeb, S. K.; Wolfe, M. K.; Catoe, D.; Sinnott-Armstrong, N.; Kim, S.; Yamahara, K. M.; Sassoubre, L. M.; Mendoza Grijalva, L. M.; Roldan-Hernandez, L.; Langenfeld, K.; Wigginton, K. R.; Boehm, A. B. SARS-CoV-2 RNA in Wastewater Settled Solids Is Associated with COVID-19 Cases in a Large Urban Sewershed. *Environ. Sci. Technol.* **2021**, *55* (1), 488–498. <https://doi.org/10.1021/acs.est.0c06191>.
- (7) Balboa, S.; Mauricio-Iglesias, M.; Rodriguez, S.; Martínez-Lamas, L.; Vasallo, F. J.; Regueiro, B.; Lema, J. M. The Fate of SARS-COV-2 in WWTPS Points out the Sludge Line as a Suitable Spot for Detection of COVID-19. *Science of The Total Environment* **2021**, *772*, 145268. <https://doi.org/10.1016/j.scitotenv.2021.145268>.
- (8) Reese, H.; Iuliano, A. D.; Patel, N. N.; Garg, S.; Kim, L.; Silk, B. J.; Hall, A. J.; Fry, A.; Reed, C. Estimated Incidence of Coronavirus Disease 2019 (COVID-19) Illness and Hospitalization—United States, February–September 2020. *Clinical Infectious Diseases* **2021**, *72* (12), e1010–e1017. <https://doi.org/10.1093/cid/ciaa1780>.
- (9) Iuliano, A. D.; Chang, H. H.; Patel, N. N.; Threlkel, R.; Kniss, K.; Reich, J.; Steele, M.; Hall, A. J.; Fry, A. M.; Reed, C. Estimating Under-Recognized COVID-19 Deaths, United States, March 2020-May 2021 Using an Excess Mortality Modelling Approach. *The Lancet Regional Health - Americas* **2021**, *1*, 100019. <https://doi.org/10.1016/j.lana.2021.100019>.
- (10) Ahmed, W.; Angel, N.; Edson, J.; Bibby, K.; Bivins, A.; O'Brien, J. W.; Choi, P. M.; Kitajima, M.; Simpson, S. L.; Li, J.; Tschärke, B.; Verhagen, R.; Smith, W. J. M.; Zaugg, J.; Dierens, L.; Hugenholtz, P.; Thomas, K. V.; Mueller, J. F. First Confirmed Detection of

- SARS-CoV-2 in Untreated Wastewater in Australia: A Proof of Concept for the Wastewater Surveillance of COVID-19 in the Community. *Science of The Total Environment* **2020**, 728, 138764. <https://doi.org/10.1016/j.scitotenv.2020.138764>.
- (11) Saththasivam, J.; El-Malah, S. S.; Gomez, T. A.; Jabbar, K. A.; Remanan, R.; Krishnankutty, A. K.; Ogunbiyi, O.; Rasool, K.; Ashhab, S.; Rashkeev, S.; Bensaad, M.; Ahmed, A. A.; Mohamoud, Y. A.; Malek, J. A.; Abu Raddad, L. J.; Jeremijenko, A.; Abu Halaweh, H. A.; Lawler, J.; Mahmoud, K. A. COVID-19 (SARS-CoV-2) Outbreak Monitoring Using Wastewater-Based Epidemiology in Qatar. *Science of The Total Environment* **2021**, 774, 145608. <https://doi.org/10.1016/j.scitotenv.2021.145608>.
- (12) Gerrity, D.; Papp, K.; Stoker, M.; Sims, A.; Frehner, W. Early-Pandemic Wastewater Surveillance of SARS-CoV-2 in Southern Nevada: Methodology, Occurrence, and Incidence/Prevalence Considerations. *Water Research X* **2021**, 10, 100086. <https://doi.org/10.1016/j.wroa.2020.100086>.
- (13) Ahmed, W.; Bertsch, P. M.; Bibby, K.; Haramoto, E.; Hewitt, J.; Huygens, F.; Gyawali, P.; Korajkic, A.; Riddell, S.; Sherchan, S. P.; Simpson, S. L.; Sirikanchana, K.; Symonds, E. M.; Verhagen, R.; Vasani, S. S.; Kitajima, M.; Bivins, A. Decay of SARS-CoV-2 and Surrogate Murine Hepatitis Virus RNA in Untreated Wastewater to Inform Application in Wastewater-Based Epidemiology. *Environmental Research* **2020**, 191, 110092. <https://doi.org/10.1016/j.envres.2020.110092>.
- (14) Bivins, A.; Greaves, J.; Fischer, R.; Yinda, K. C.; Ahmed, W.; Kitajima, M.; Munster, V. J.; Bibby, K. Persistence of SARS-CoV-2 in Water and Wastewater. *Environ. Sci. Technol. Lett.* **2020**, 7 (12), 937–942. <https://doi.org/10.1021/acs.estlett.0c00730>.
- (15) de Oliveira, L. C.; Torres-Franco, A. F.; Lopes, B. C.; Santos, B. S. Á. da S.; Costa, E. A.; Costa, M. S.; Reis, M. T. P.; Melo, M. C.; Polizzi, R. B.; Teixeira, M. M.; Mota, C. R. Viability of SARS-CoV-2 in River Water and Wastewater at Different Temperatures and Solids Content. *Water Research* **2021**, 195, 117002. <https://doi.org/10.1016/j.watres.2021.117002>.
- (16) Hokajärvi, A.-M.; Rytönen, A.; Tiwari, A.; Kauppinen, A.; Oikarinen, S.; Lehto, K.-M.; Kankaanpää, A.; Gunnar, T.; Al-Hello, H.; Blomqvist, S.; Miettinen, I. T.; Savolainen-Kopra, C.; Pitkänen, T. The Detection and Stability of the SARS-CoV-2 RNA Biomarkers in Wastewater Influent in Helsinki, Finland. *Science of The Total Environment* **2021**, 770, 145274. <https://doi.org/10.1016/j.scitotenv.2021.145274>.
- (17) Weidhaas, J.; Aanderud, Z. T.; Roper, D. K.; VanDerslice, J.; Gaddis, E. B.; Ostermiller, J.; Hoffman, K.; Jamal, R.; Heck, P.; Zhang, Y.; Torgersen, K.; Laan, J. V.; LaCross, N. Correlation of SARS-CoV-2 RNA in Wastewater with COVID-19 Disease Burden in Sewersheds. *Science of The Total Environment* **2021**, 775, 145790. <https://doi.org/10.1016/j.scitotenv.2021.145790>.
- (18) Chik, A. H. S.; Glier, M. B.; Servos, M.; Mangat, C. S.; Pang, X.-L.; Qiu, Y.; D'Aoust, P. M.; Burnet, J.-B.; Delatolla, R.; Dorner, S.; Geng, Q.; Giesy, J. P.; McKay, R. M.; Mulvey, M. R.; Prystajek, N.; Srikanthan, N.; Xie, Y.; Conant, B.; Hruday, S. E. Comparison of Approaches to Quantify SARS-CoV-2 in Wastewater Using RT-QPCR: Results and Implications from a Collaborative Inter-Laboratory Study in Canada. *Journal of Environmental Sciences* **2021**, 107, 218–229. <https://doi.org/10.1016/j.jes.2021.01.029>.
- (19) Jin, Y.; Flury, M. Fate and Transport of Viruses in Porous Media. In *Advances in Agronomy*; Elsevier, 2002; Vol. 77, pp 39–102. [https://doi.org/10.1016/S0065-2113\(02\)77013-2](https://doi.org/10.1016/S0065-2113(02)77013-2).



- (20) Simpson, A.; Topol, A.; White, B.; Wolfe, M. K.; Wigginton, K.; Boehm, A. B. *Effect of Storage Conditions on SARS-CoV-2 RNA Quantification in Wastewater Solids*; preprint; Infectious Diseases (except HIV/AIDS), 2021. <https://doi.org/10.1101/2021.05.04.21256611>.
- (21) Rosario, K.; Symonds, E. M.; Sinigalliano, C.; Stewart, J.; Breitbart, M. Pepper Mild Mottle Virus as an Indicator of Fecal Pollution. *Appl Environ Microbiol* **2009**, 75 (22), 7261–7267. <https://doi.org/10.1128/AEM.00410-09>.
- (22) Symonds, E. M.; Nguyen, K. H.; Harwood, V. J.; Breitbart, M. Pepper Mild Mottle Virus: A Plant Pathogen with a Greater Purpose in (Waste)Water Treatment Development and Public Health Management. *Water Research* **2018**, 144, 1–12. <https://doi.org/10.1016/j.watres.2018.06.066>.
- (23) Kitajima, M.; Sassi, H. P.; Torrey, J. R. Pepper Mild Mottle Virus as a Water Quality Indicator. *npj Clean Water* **2018**, 1 (1), 19. <https://doi.org/10.1038/s41545-018-0019-5>.
- (24) Rachmadi, A. T.; Kitajima, M.; Pepper, I. L.; Gerba, C. P. Enteric and Indicator Virus Removal by Surface Flow Wetlands. *Science of The Total Environment* **2016**, 542, 976–982. <https://doi.org/10.1016/j.scitotenv.2015.11.001>.
- (25) Huisman, J. S.; Scire, J.; Caduff, L.; Fernandez-Cassi, X.; Ganesanandamoorthy, P.; Kull, A.; Scheidegger, A.; Stachler, E.; Boehm, A. B.; Hughes, B.; Knudson, A.; Topol, A.; Wigginton, K. R.; Wolfe, M. K.; Kohn, T.; Ort, C.; Stadler, T.; Julian, T. R. *Wastewater-Based Estimation of the Effective Reproductive Number of SARS-CoV-2*; preprint; Public and Global Health, 2021. <https://doi.org/10.1101/2021.04.29.21255961>.
- (26) Topol, A.; Wolfe, M.; Wigginton, K.; White, B.; Boehm, A. High Throughput RNA Extraction and PCR Inhibitor Removal of Settled Solids for Wastewater Surveillance of SARS-CoV-2 RNA V1. <https://doi.org/10.17504/protocols.io.btyrnpv6>.
- (27) Wolfe, M. K.; Topol, A.; Knudson, A.; Simpson, A.; White, B.; Vugia, D. J.; Yu, A. T.; Li, L.; Balliet, M.; Stoddard, P.; Han, G. S.; Wigginton, K. R.; Boehm, A. B. *High Frequency, High Throughput Quantification of SARS-CoV-2 RNA in Wastewater Settled Solids at Eight Publicly Owned Treatment Works in Northern California Shows Strong Association with COVID-19 Incidence*; preprint; Public and Global Health, 2021. <https://doi.org/10.1101/2021.07.16.21260627>.
- (28) Silverman, A. I.; Boehm, A. B. Systematic Review and Meta-Analysis of the Persistence and Disinfection of Human Coronaviruses and Their Viral Surrogates in Water and Wastewater. *Environ. Sci. Technol. Lett.* **2020**, 7 (8), 544–553. <https://doi.org/10.1021/acs.estlett.0c00313>.
- (29) Silverman, A. I.; Boehm, A. B. Systematic Review and Meta-Analysis of the Persistence of Enveloped Viruses in Environmental Waters and Wastewater in the Absence of Disinfectants. *Environ. Sci. Technol.* **2021**, 55 (21), 14480–14493. <https://doi.org/10.1021/acs.est.1c03977>.
- (30) Borchardt, M. A.; Boehm, A. B.; Salit, M.; Spencer, S. K.; Wigginton, K. R.; Noble, R. T. The Environmental Microbiology Minimum Information (EMMI) Guidelines: QPCR and DPCR Quality and Reporting for Environmental Microbiology. *Environ. Sci. Technol.* **2021**, acs.est.1c01767. <https://doi.org/10.1021/acs.est.1c01767>.
- (31) Kantor, R. S.; Nelson, K. L.; Greenwald, H. D.; Kennedy, L. C. Challenges in Measuring the Recovery of SARS-CoV-2 from Wastewater. *Environ. Sci. Technol.* **2021**, 55 (6), 3514–3519. <https://doi.org/10.1021/acs.est.0c08210>.

- (32) Ho, J.; Stange, C.; Suhrborg, R.; Wurzbacher, C.; Drewes, J. E.; Tiehm, A. *SARS-CoV-2 Wastewater Surveillance in Germany: Long-Term PCR Monitoring, Suitability of Primer/Probe Combinations and Biomarker Stability*; preprint; *Epidemiology*, 2021. <https://doi.org/10.1101/2021.09.16.21263575>.
- (33) Wurtzer, S.; Waldman, P.; Ferrier-Rembert, A.; Frenois-Veyrat, G.; Mouchel, J. M.; Boni, M.; Maday, Y.; Marechal, V.; Moulin, L. Several Forms of SARS-CoV-2 RNA Can Be Detected in Wastewaters: Implication for Wastewater-Based Epidemiology and Risk Assessment. *Water Research* **2021**, *198*, 117183. <https://doi.org/10.1016/j.watres.2021.117183>.
- (34) Robinson, C. A.; Hsieh, H.-Y.; Hsu, S.-Y.; Wang, Y.; Salcedo, B. T.; Belenchia, A.; Klutts, J.; Zemmer, S.; Reynolds, M.; Semkiw, E.; Foley, T.; Wan, X.; Wieberg, C. G.; Wenzel, J.; Lin, C.-H.; Johnson, M. C. Defining Biological and Biophysical Properties of SARS-CoV-2 Genetic Material in Wastewater. *Science of The Total Environment* **2022**, *807*, 150786. <https://doi.org/10.1016/j.scitotenv.2021.150786>.
- (35) Walters, S. P.; Yamahara, K. M.; Boehm, A. B. Persistence of Nucleic Acid Markers of Health-Relevant Organisms in Seawater Microcosms: Implications for Their Use in Assessing Risk in Recreational Waters. *Water Research* **2009**, *43* (19), 4929–4939. <https://doi.org/10.1016/j.watres.2009.05.047>.
- (36) Hughes, B.; Duong, D.; White, B. J.; Wigginton, K. R.; Chan, E. M. G.; Wolfe, M. K.; Boehm, A. B. *Respiratory Syncytial Virus (RSV) RNA in Wastewater Settled Solids Reflects RSV Clinical Positivity Rates*; preprint; *Infectious Diseases (except HIV/AIDS)*, 2021. <https://doi.org/10.1101/2021.12.01.21267014>.
