# Supplementary material for: Persistence of endogenous SARS-CoV-2 and pepper mild mottle virus RNA in wastewater settled solids
Source: bioRxiv or medRxiv preprint supplement (doi:10.1101/2022.01.06.22268855), 2022-01-07
Supplement: Supplementary file [file media-1.pdf]

1 **Supporting Information**

2  
3 **Persistence of endogenous SARS-CoV-2 and pepper mild mottle virus RNA in wastewater**  
4 **settled solids**

5  
6 Laura Roldan-Hernandez<sup>1</sup>, Katherine E. Graham<sup>1</sup>, Dorothea Duong<sup>2</sup>, Alexandria B. Boehm<sup>1</sup>

7  
8 <sup>1</sup> Department of Civil and Environmental Engineering, Stanford University, 473 Via Ortega,  
9 Stanford 94305, California, United States

10 <sup>2</sup> Verily Life Sciences, South San Francisco, 94080, California, United States

11  
12 Corresponding Author:

13 Alexandria B. Boehm, 650-724-9128, aboehm@stanford.edu

14  
15 **Number of pages: 5**

16 **Number of Tables: 3**

17 **Table S1: Search terms and statistics for literature review; Persistence of SARS-CoV-2 and PMMoV**  
 18 **in wastewater or environmental waters.**

| Virus      | Search engine and field                                       | Search terms                                                                                                        | Number of papers identified | Number of papers included | Number of k extracted | References |
|------------|---------------------------------------------------------------|---------------------------------------------------------------------------------------------------------------------|-----------------------------|---------------------------|-----------------------|------------|
| SARS-CoV-2 | Web of science core collection<br><br>Search field = title    | SARS-CoV-2 AND wastewater AND persistence OR decay OR stability                                                     | 9                           | 5                         | 21                    | 1-5        |
| PMMoV      | Web of science core collection<br><br>Search field = abstract | PMMoV OR Pepper Mild Mottle Virus AND wastewater or environment* AND persistence OR decay OR stability OR viability | 6                           | 1                         | 3                     | 6          |

19 k = first-order decay rate constant

**Table S2: Primers and probes for RT-ddPCR assays**

| Assay target  | Primer/Probe Sequence (5'-3') |                                                   | Aplicon length (bp) | Reference                                                   |
|---------------|-------------------------------|---------------------------------------------------|---------------------|-------------------------------------------------------------|
| SARS-CoV-2 N1 | Forward                       | GACCCCAAATCAGCGAAAT                               | 72                  | Lu et al. <sup>7</sup>                                      |
|               | Reverse                       | TCTGGTTACTGCCAGTTGAATCTG                          |                     |                                                             |
|               | Probe                         | ACCCCGCATTACGTTTGGTGGACC (5' FAM/ZEN/3' IBFQ)     |                     |                                                             |
| SARS-CoV-2 N2 | Forward                       | TTACAAACATTGGCCGCAA                               | 62                  | Lu et al. <sup>7</sup>                                      |
|               | Reverse                       | GCG CGACATTCCGAAGAA                               |                     |                                                             |
|               | Probe                         | ACAATTTGCCCCCAGCGCTTCAG (5' HEX/ZEN/3' IBFQ)      |                     |                                                             |
| BCoV          | Forward                       | CTGGAAGTTGGTGGAGTT                                | 85                  | Decaro et al. <sup>8</sup>                                  |
|               | Reverse                       | ATTATCGGCCTAACATACATC                             |                     |                                                             |
|               | Probe                         | CCTTCATATCTATACACATCAAGTTGTT (5' FAM/ZEN/3' IBFQ) |                     |                                                             |
| PMMoV         | Forward                       | GAGTGGTTTGACCTTAACGTTTGA                          | 68                  | Haramoto et al. <sup>9</sup> and Zhang et al. <sup>10</sup> |
|               | Reverse                       | TTGTCGGTTGCAATGCAAGT                              |                     |                                                             |
|               | Probe                         | CCTACCGAAGCAAATG (5' HEX/ZEN/3' IBFQ)             |                     |                                                             |

**Table S3: Characteristics of POTWs and primary settled solid samples**

| Description                                                       | POTW A                                            | POTW B                                         |
|-------------------------------------------------------------------|---------------------------------------------------|------------------------------------------------|
| Name                                                              | San José-Santa Clara Regional Wastewater Facility | Sacramento Regional Wastewater Treatment Plant |
| Population served                                                 | 1.4 million                                       | 1.6 million                                    |
| Flow (MGD)                                                        | 110                                               | 124                                            |
| Average residence time in the sewer network (hours)               | 4-18                                              | 15                                             |
| Average residence time of solids in the primary clarifier (hours) | 1-2                                               | 1                                              |
| Type of sample                                                    | 24-hour composite (500 mL gathered every 4 hours) | grab                                           |
| Percent of solid (%) in primary settled solid samples             | 14.07                                             | 16.57                                          |

**References**

- (1) Ahmed, W.; Bertsch, P. M.; Bibby, K.; Haramoto, E.; Hewitt, J.; Huygens, F.; Gyawali, P.; Korajkic, A.; Riddell, S.; Sherchan, S. P.; Simpson, S. L.; Sirikanchana, K.; Symonds, E. M.; Verhagen, R.; Vasan, S. S.; Kitajima, M.; Bivins, A. Decay of SARS-CoV-2 and Surrogate Murine Hepatitis Virus RNA in Untreated Wastewater to Inform Application in Wastewater-Based Epidemiology. *Environmental Research* **2020**, *191*, 110092. <https://doi.org/10.1016/j.envres.2020.110092>.
- (2) Bivins, A.; Greaves, J.; Fischer, R.; Yinda, K. C.; Ahmed, W.; Kitajima, M.; Munster, V. J.; Bibby, K. Persistence of SARS-CoV-2 in Water and Wastewater. *Environ. Sci. Technol. Lett.* **2020**, *7* (12), 937–942. <https://doi.org/10.1021/acs.estlett.0c00730>.
- (3) de Oliveira, L. C.; Torres-Franco, A. F.; Lopes, B. C.; Santos, B. S. Á. da S.; Costa, E. A.; Costa, M. S.; Reis, M. T. P.; Melo, M. C.; Polizzi, R. B.; Teixeira, M. M.; Mota, C. R. Viability of SARS-CoV-2 in River Water and Wastewater at Different Temperatures and Solids Content. *Water Research* **2021**, *195*, 117002. <https://doi.org/10.1016/j.watres.2021.117002>.
- (4) Hokajärvi, A.-M.; Rytönen, A.; Tiwari, A.; Kauppinen, A.; Oikarinen, S.; Lehto, K.-M.; Kankaanpää, A.; Gunnar, T.; Al-Hello, H.; Blomqvist, S.; Miettinen, I. T.; Savolainen-Kopra, C.; Pitkänen, T. The Detection and Stability of the SARS-CoV-2 RNA Biomarkers in Wastewater Influent in Helsinki, Finland. *Science of The Total Environment* **2021**, *770*, 145274. <https://doi.org/10.1016/j.scitotenv.2021.145274>.
- (5) Weidhaas, J.; Aanderud, Z. T.; Roper, D. K.; VanDerslice, J.; Gaddis, E. B.; Ostermiller, J.; Hoffman, K.; Jamal, R.; Heck, P.; Zhang, Y.; Torgersen, K.; Laan, J. V.; LaCross, N. Correlation of SARS-CoV-2 RNA in Wastewater with COVID-19 Disease Burden in Sewersheds. *Science of The Total Environment* **2021**, *775*, 145790. <https://doi.org/10.1016/j.scitotenv.2021.145790>.
- (6) Rachmadi, A. T.; Kitajima, M.; Pepper, I. L.; Gerba, C. P. Enteric and Indicator Virus Removal by Surface Flow Wetlands. *Science of The Total Environment* **2016**, *542*, 976–982. <https://doi.org/10.1016/j.scitotenv.2015.11.001>.
- (7) Lu, X.; Wang, L.; Sakthivel, S. K.; Whitaker, B.; Murray, J.; Kamili, S.; Lynch, B.; Malapati, L.; Burke, S. A.; Harcourt, J.; Tamin, A.; Thornburg, N. J.; Villanueva, J. M.; Lindstrom, S. US CDC

Real-Time Reverse Transcription PCR Panel for Detection of Severe Acute Respiratory Syndrome Coronavirus 2. *Emerg. Infect. Dis.* **2020**, *26* (8), 1654–1665.

<https://doi.org/10.3201/eid2608.201246>.

- (8) Decaro, N.; Elia, G.; Campolo, M.; Desario, C.; Mari, V.; Radogna, A.; Colaianni, M. L.; Cirone, F.; Tempesta, M.; Buonavoglia, C. Detection of Bovine Coronavirus Using a TaqMan-Based Real-Time RT-PCR Assay. *Journal of Virological Methods* **2008**, *151* (2), 167–171. <https://doi.org/10.1016/j.jviromet.2008.05.016>.
- (9) Haramoto, E.; Kitajima, M.; Kishida, N.; Konno, Y.; Katayama, H.; Asami, M.; Akiba, M. Occurrence of Pepper Mild Mottle Virus in Drinking Water Sources in Japan. *Appl. Environ. Microbiol.* **2013**, *79* (23), 7413–7418. <https://doi.org/10.1128/AEM.02354-13>.
- (10) Zhang, T.; Breitbart, M.; Lee, W. H.; Run, J.-Q.; Wei, C. L.; Soh, S. W. L.; Hibberd, M. L.; Liu, E. T.; Rohwer, F.; Ruan, Y. RNA Viral Community in Human Feces: Prevalence of Plant Pathogenic Viruses. *PLoS Biol* **2005**, *4* (1), e3. <https://doi.org/10.1371/journal.pbio.0040003>.
